# Supplementary material for: Importance of whole genome sequencing for the assessment of outbreaks in diagnostic laboratories: analysis of a case series of invasive Streptococcus pyogenes infections
Source: Springer Nature journal article supplement (doi:10.1007/s10096-017-2905-z), 2017-01-26
Supplement: MOESM1 [file 12021184]

## Supplementary materials

**Table S1 List of the complete *Streptococcus pyogenes* genomes used for the phylogenetic analysis** Core-genome phylogeny was done using Parsnp [1]. SF370 was used as reference for the detection of mutations in *covR*, *covS*, *rocA*, *ropB*. FDAARGOS\_149, MGAS8232 and STAB10015 were used as references to detect SNPs in the core-genome of the 3 groups of closely related isolates (ISR3 & ISR4, ISR7 & ISR8 and ISR9 & ISR11, respectively).

| Strain           | BioSample    | BioProject  | Assembly        | Size (Mb) | GC%  | Genes | Proteins | Release Date |
|------------------|--------------|-------------|-----------------|-----------|------|-------|----------|--------------|
| <b>SF370</b>     | SAMN02604089 | PRJNA269    | GCA_000006785.2 | 1.85243   | 38.5 | 1801  | 1693     | 10.04.01     |
| <b>MGAS8232</b>  | SAMN02603495 | PRJNA286    | GCA_000007285.1 | 1.89502   | 38.5 | 1920  | 1794     | 31.01.02     |
| <b>MGAS315</b>   | SAMN02603496 | PRJNA311    | GCA_000007425.1 | 1.90052   | 38.6 | 1923  | 1804     | 18.07.02     |
| <b>Manfredo</b>  | SAMEA1705956 | PRJNA270    | GCA_000009385.1 | 1.84127   | 38.6 | 1841  | 1720     | 05.02.07     |
| <b>SSI-1</b>     | -            | PRJNA301    | GCA_000011285.1 | 1.89427   | 38.6 | 1912  | 1808     | 04.03.03     |
| <b>MGAS10394</b> | SAMN02603497 | PRJNA12469  | GCA_000011665.1 | 1.89988   | 38.7 | 1875  | 1738     | 03.08.04     |
| <b>MGAS5005</b>  | SAMN02603500 | PRJNA13888  | GCA_000011765.2 | 1.83856   | 38.5 | 1835  | 1724     | 05.08.05     |
| <b>MGAS6180</b>  | SAMN02603499 | PRJNA13887  | GCA_000012165.1 | 1.89757   | 38.4 | 1870  | 1748     | 04.08.05     |
| <b>MGAS9429</b>  | SAMN02603501 | PRJNA16363  | GCA_000013485.1 | 1.83647   | 38.5 | 1800  | 1680     | 04.05.06     |
| <b>MGAS10270</b> | SAMN02603502 | PRJNA16364  | GCA_000013505.1 | 1.92825   | 38.4 | 1923  | 1778     | 04.05.06     |
| <b>MGAS2096</b>  | SAMN02603503 | PRJNA16365  | GCA_000013525.1 | 1.86035   | 38.7 | 1809  | 1609     | 04.05.06     |
| <b>MGAS10750</b> | SAMN02603504 | PRJNA16366  | GCA_000013545.1 | 1.93711   | 38.3 | 1924  | 1770     | 04.05.06     |
| <b>NZ131</b>     | SAMN02604236 | PRJNA20707  | GCA_000018125.1 | 1.81578   | 38.6 | 1791  | 1626     | 16.10.08     |
| <b>Alab49</b>    | SAMN02603353 | PRJNA73399  | GCA_000230295.1 | 1.82731   | 38.6 | 1816  | 1699     | 07.10.11     |
| <b>MGAS15252</b> | SAMN02603944 | PRJNA49669  | GCA_000250905.1 | 1.75083   | 38.5 | 1693  | 1587     | 01.03.12     |
| <b>MGAS1882</b>  | SAMN02603945 | PRJNA66081  | GCA_000250925.1 | 1.78103   | 38.5 | 1728  | 1624     | 01.03.12     |
| <b>A20</b>       | SAMN02603640 | PRJNA175952 | GCA_000307535.1 | 1.83728   | 38.5 | 1833  | 1724     | 22.10.12     |
| <b>M1 476</b>    | -            | PRJDB141    | GCA_000349925.2 | 1.83113   | 38.5 | 1820  | 1721     | 14.07.12     |

|                     |              |             |                 |         |      |      |      |          |
|---------------------|--------------|-------------|-----------------|---------|------|------|------|----------|
| <b>HSC5</b>         | SAMN02604317 | PRJNA205050 | GCA_000422045.1 | 1.81835 | 38.5 | 1806 | 1686 | 11.07.13 |
| <b>STAB902</b>      | SAMN03081524 | PRJNA231895 | GCA_000732425.1 | 1.89212 | 38.5 | 1912 | 1804 | 22.07.14 |
| <b>ATCC 19615</b>   | SAMN02905033 | PRJNA244349 | GCA_000743015.1 | 1.8448  | 38.5 | 1835 | 1702 | 22.08.14 |
| <b>M23ND</b>        | SAMN02800743 | PRJNA248257 | GCA_000756485.1 | 1.84648 | 38.6 | 1839 | 1719 | 22.09.14 |
| <b>7F7</b>          | SAMN02644974 | PRJNA238516 | GCA_000767505.1 | 1.70979 | 38.6 | 1653 | 1546 | 20.10.14 |
| <b>HKU360</b>       | SAMN02980885 | PRJNA257934 | GCA_000772185.1 | 1.94454 | 38.5 | 1916 | 1809 | 05.11.14 |
| <b>1E1</b>          | SAMN02649402 | PRJNA238987 | GCA_000772245.1 | 1.79615 | 38.5 | 1741 | 1614 | 05.11.14 |
| <b>AP1</b>          | SAMN02716635 | PRJNA242701 | GCA_000993765.1 | 1.90829 | 38.5 | 1930 | 1830 | 07.05.15 |
| <b>JRS4 (Wash.)</b> | SAMN03610013 | PRJNA283215 | GCA_001014285.1 | 1.81197 | 38.6 | 1788 | 1667 | 28.05.15 |
| <b>D471</b>         | SAMN03610015 | PRJNA283214 | GCA_001014305.1 | 1.81197 | 38.6 | 1788 | 1667 | 28.05.15 |
| <b>NGAS743</b>      | SAMN02715744 | PRJNA243328 | GCA_001019635.1 | 1.91555 | 38.5 | 1924 | 1805 | 03.06.15 |
| <b>NGAS596</b>      | SAMN02715758 | PRJNA243328 | GCA_001019675.1 | 1.79131 | 38.5 | 1739 | 1617 | 03.06.15 |
| <b>NGAS327</b>      | SAMN02715759 | PRJNA243328 | GCA_001019695.1 | 1.70205 | 38.6 | 1644 | 1537 | 03.06.15 |
| <b>M28PF1</b>       | SAMN03733610 | PRJNA284654 | GCA_001020185.2 | 1.89698 | 38.4 | 1874 | 1752 | 05.06.15 |
| <b>5448</b>         | SAMN02866032 | PRJNA252999 | GCA_001021955.1 | 1.82952 | 38.5 | 1817 | 1725 | 08.06.15 |
| <b>STAB10015</b>    | SAMN03418291 | PRJNA278400 | GCA_001023495.1 | 1.95045 | 38.2 | 1917 | 1800 | 09.06.15 |
| <b>H293</b>         | SAMEA3865279 | PRJEB1935   | GCA_001039695.2 | 1.72625 | 38.6 | 1661 | 1539 | 13.05.14 |
| <b>HKU488</b>       | SAMN03846812 | PRJNA289181 | GCA_001051095.1 | 1.94341 | 38.5 | 1944 | 1832 | 09.07.15 |
| <b>NGAS322</b>      | SAMN03274509 | PRJNA243328 | GCA_001267805.1 | 1.95047 | 38.3 | 1929 | 1809 | 17.08.15 |
| <b>NGAS638</b>      | SAMN03274510 | PRJNA243328 | GCA_001267845.1 | 1.7914  | 38.6 | 1758 | 1650 | 17.08.15 |
| <b>MEW427</b>       | SAMN04419118 | PRJNA308988 | GCA_001535505.1 | 1.81445 | 38.5 | 1767 | 1554 | 25.01.16 |
| <b>MEW123</b>       | SAMN04419117 | PRJNA308987 | GCA_001535565.1 | 1.8787  | 38.3 | 1827 | 1653 | 25.01.16 |
| <b>JRS4 (Tokyo)</b> | -            | PRJDB114    | GCA_001547715.1 | 1.81112 | 38.6 | 1785 | 1657 | 04.04.15 |
| <b>MTB313</b>       | SAMD00000328 | PRJDB1654   | GCA_001547815.1 | 1.74533 | 38.5 | 1843 | 1758 | 24.02.15 |
| <b>MTB314</b>       | SAMD00000332 | PRJDB1668   | GCA_001547835.1 | 1.74483 | 38.5 | 1722 | 1588 | 24.02.15 |
| <b>FDAARGOS_149</b> | SAMN03996295 | PRJNA231221 | GCA_001559175.1 | 1.83964 | 38.5 | 1831 | 1720 | 11.02.16 |
| <b>AP53</b>         | SAMN04334485 | PRJNA305806 | GCA_001620285.1 | 1.86055 | 38.6 | 1862 | 1742 | 18.04.16 |
| <b>MGAS11027</b>    | SAMN03792044 | PRJNA167314 | GCA_001635895.1 | 1.78687 | 38.6 | 1738 | 1617 | 02.05.16 |
| <b>MGAS23530</b>    | SAMN03775331 | PRJNA287028 | GCA_001635935.1 | 1.70939 | 38.5 | 1640 | 1527 | 02.05.16 |

|                  |              |             |                 |         |      |      |      |          |
|------------------|--------------|-------------|-----------------|---------|------|------|------|----------|
| <b>MGAS27061</b> | SAMN03161558 | PRJNA266333 | GCA_001635975.1 | 1.74135 | 38.5 | 1675 | 1565 | 02.05.16 |
| <b>NS53</b>      | SAMN04625972 | PRJNA317786 | GCA_001638845.1 | 1.76512 | 38.4 | 1693 | 1587 | 06.05.16 |
| <b>STAB09014</b> | SAMN03418290 | PRJNA278400 | GCA_001678885.1 | 1.86249 | 38.4 | 1823 | 1697 | 05.07.16 |
| <b>STAB901</b>   | SAMN03081523 | PRJNA232121 | GCA_000732385.1 | 1.79561 | 38.5 | 1812 | 1358 | 22.07.14 |

**Table S2 Assemblies statistics determined using Quast version 3.1 [2], median coverage determined by mapping the trimmed reads on the assemblies and accession numbers**

|                                           | ISR1           | ISR2           | ISR3           | ISR4           | ISR5           | ISR6           | ISR7           | ISR8           | ISR9           | ISR10          | ISR11          |
|-------------------------------------------|----------------|----------------|----------------|----------------|----------------|----------------|----------------|----------------|----------------|----------------|----------------|
| <b>Number of contigs (&gt;= 0 bp)</b>     | 71             | 32             | 58             | 35             | 73             | 36             | 41             | 53             | 22             | 19             | 32             |
| <b>Number of contigs (&gt;= 1000 bp)</b>  | 29             | 19             | 23             | 17             | 30             | 26             | 26             | 33             | 18             | 16             | 21             |
| <b>Number of contigs (&gt;= 10000 bp)</b> | 14             | 12             | 15             | 13             | 18             | 19             | 18             | 19             | 12             | 12             | 15             |
| <b>Number of contigs (&gt;= 50000 bp)</b> | 12             | 12             | 11             | 10             | 11             | 11             | 13             | 13             | 10             | 10             | 10             |
| <b>Largest contig</b>                     | 516565         | 305309         | 751698         | 751702         | 278987         | 265863         | 251794         | 251794         | 504539         | 630053         | 529116         |
| <b>Total length (&gt;= 0 bp)</b>          | 1838723        | 1866975        | 1820544        | 1809116        | 1863500        | 1856594        | 1849575        | 1877415        | 1823476        | 1690061        | 1850892        |
| <b>Total length (&gt;= 1000 bp)</b>       | 1823729        | 1862425        | 1804961        | 1802965        | 1846068        | 1852149        | 1844325        | 1868156        | 1822707        | 1689494        | 1847894        |
| <b>Total length (&gt;= 10000 bp)</b>      | 1791557        | 1847827        | 1788337        | 1793215        | 1817829        | 1839380        | 1822960        | 1812159        | 1809795        | 1680544        | 1834982        |
| <b>Total length (&gt;= 50000 bp)</b>      | 1729935        | 1847827        | 1688855        | 1732523        | 1649245        | 1633436        | 1641065        | 1598590        | 1759057        | 1604391        | 1702270        |
| <b>N50</b>                                | 171252         | 225304         | 203845         | 221880         | 219677         | 206099         | 133991         | 134362         | 243478         | 163042         | 243478         |
| <b>L50</b>                                | 4              | 4              | 2              | 2              | 4              | 4              | 5              | 5              | 3              | 3              | 3              |
| <b>GC (%)</b>                             | 38.42          | 38.48          | 38.36          | 38.39          | 38.38          | 38.43          | 38.34          | 38.33          | 38.19          | 38.4           | 38.21          |
| <b>Median coverage</b>                    | 430            | 349            | 270            | 372            | 150            | 205            | 184            | 203            | 196            | 216            | 173            |
| <b>Contigs accession number</b>           | ERS<br>1420141 | ERS<br>1420142 | ERS<br>1420143 | ERS<br>1420144 | ERS<br>1420145 | ERS<br>1420146 | ERS<br>1420147 | ERS<br>1420148 | ERS<br>1420149 | ERS<br>1420150 | ERS<br>1420151 |

**Table S3 Mutations detected in 4 different regulatory genes (*covR*, *covS*, *rocA*, *ropB*) and their effect on gene products**

WT: Wild Type, nr: nucleotide replacement, del: deletion.

\*mutations described by Ikebe et al. [3] °mutations described by Lynskey et al. [4]

| Strain                  | <i>covR</i> | Effect | <i>covS</i>           | Effect                    | <i>rocA</i>                | Effect                                                          | <i>ropB/rgg</i> | Effect |
|-------------------------|-------------|--------|-----------------------|---------------------------|----------------------------|-----------------------------------------------------------------|-----------------|--------|
| <i>emm 1</i>            |             |        |                       |                           |                            |                                                                 |                 |        |
| ISR3                    | WT          | -      | nr                    | I332V                     | WT                         | -                                                               | WT              | -      |
| ISR4                    | WT          | -      | nr                    | I332V                     | WT                         | -                                                               | WT              | -      |
| <i>emm 22</i>           |             |        |                       |                           |                            |                                                                 |                 |        |
| ISR7                    | Nr          | V128A  | nr                    | -                         | nr                         | R259Q, V333A                                                    | WT              | -      |
| ISR8                    | Nr          | V128A  | nr                    | -                         | nr                         | R259Q, V333A                                                    | WT              | -      |
| <i>emm 28</i>           |             |        |                       |                           |                            |                                                                 |                 |        |
| ISR9                    | Nr          | -      | nr                    | E226G*                    | nr                         | R259Q, D396N, I404T                                             | nr              | -      |
| ISR11                   | nr          | -      | Del 1bp<br>(base 508) | Truncation at<br>aa. 180* | nr                         | R259Q, D396N, I404T                                             | nr              | -      |
| Other <i>emm</i> -types |             |        |                       |                           |                            |                                                                 |                 |        |
| ISR1 - <i>emm 3</i>     | Nr          | -      | nr                    | -                         | nr, 1bp del<br>(base 1228) | I203N, L247F, R259Q,<br>D396N, I404T,<br>truncation at aa. 416° | nr              | -      |
| ISR2 - <i>emm 75</i>    | WT          | -      | nr                    | S337L                     | nr                         | R259Q                                                           | nr              | -      |
| ISR5 - <i>emm 49</i>    | Nr          | -      | nr                    | -                         | nr                         | R259Q                                                           | nr              | -      |
| ISR6 - <i>emm 5</i>     | Nr          | -      | nr                    | K498N                     | nr                         | V47A, R259Q, D396N,<br>I404T, P405S                             | nr              | V169I  |
| ISR10 - <i>emm 89</i>   | Nr          | -      | nr                    | -                         | nr                         | R259Q                                                           | nr              | -      |

**Table S4 Virulence factor genes their products, extracted from the Virulence Factor Database [5]**

| Virulence factors                                                                        |                                                                    |
|------------------------------------------------------------------------------------------|--------------------------------------------------------------------|
| <i>ccmA</i> : ABC transporter involved in cytochrome c biogenesis, ATPase component CcmA | <i>mf/spd</i> : Streptodornase                                     |
| <i>cheA</i> : chemotaxis histidine kinase                                                | <i>mf2</i> : deoxyribonuclease, phage-associated                   |
| <i>cpa</i> : fibronectin-binding protein, GAS pilus tip adhesin                          | <i>mf3</i> : deoxyribonuclease                                     |
| <i>EF0818</i> : polysaccharide lyase, family 8 (Hyaluronidase)                           | <i>scpA</i> : C5a peptidase precursor                              |
| <i>emm</i> : M protein                                                                   | <i>scpB</i> : streptococcal C5a peptidase                          |
| <i>fbaA</i> : protein F2 like fibronectin-binding protein                                | <i>sic</i> : streptococcal inhibitor of complement                 |
| <i>fbaB</i> : fibronectin-binding protein SfbII                                          | <i>ska</i> : streptokinase A precursor                             |
| <i>fbp54</i> : fibronectin-binding protein Fbp54                                         | <i>slo</i> : streptolysin O precursor                              |
| <i>fctA</i> : major pilin FctA                                                           | <i>smeZ</i> : streptococcal mitogenic exotoxin Z                   |
| <i>fctB</i> : minor pilin FctB                                                           | <i>spea</i> : streptococcal exotoxin A precursor, phage-associated |
| <i>grab</i> : protein G-related alpha 2M-binding protein                                 | <i>speB</i> : pyrogenic exotoxin B                                 |
| <i>hasA</i> : hyaluronate synthase                                                       | <i>spec</i> : streptococcal exotoxin C precursor, phage-associated |
| <i>hasB</i> : UDP-glucose 6-dehydrogenase                                                | <i>speg</i> : streptococcal exotoxin G precursor                   |
| <i>hasC</i> : UDP-glucose pyrophosphorylase                                              | <i>speh</i> : streptococcal exotoxin H precursor                   |
| <i>hylP</i> : hyaluronidase, phage-associated                                            | <i>spei</i> : streptococcal exotoxin I precursor                   |
| <i>ideS/mac</i> : immunoglobulin G-degrading enzyme                                      | <i>spej</i> : streptococcal exotoxin J precursor                   |
| <i>lepA</i> : signal peptidase I                                                         | <i>spek</i> : streptococcal exotoxin SpeK, phage-associated        |
| <i>lmb</i> : Laminin-binding surface protein                                             | <i>srtC1</i> : sortase                                             |

1. Treangen TJ, Ondov BD, Koren S, Phillippy AM (2014) The Harvest suite for rapid core-genome alignment and visualization of thousands of intraspecific microbial genomes. *Genome Biol* 15:524. doi: 10.1186/PREACCEPT-2573980311437212
2. Gurevich A, Saveliev V, Vyahhi N, Tesler G (2013) QUAST: quality assessment tool for genome assemblies. *Bioinforma Oxf Engl* 29:1072–1075. doi: 10.1093/bioinformatics/btt086
3. Ikebe T, Ato M, Matsumura T, et al (2010) Highly frequent mutations in negative regulators of multiple virulence genes in group A streptococcal toxic shock syndrome isolates. *PLoS Pathog* 6:e1000832. doi: 10.1371/journal.ppat.1000832
4. Lyskey NN, Turner CE, Heng LS, Sriskandan S (2015) A Truncation in the Regulator RocA Underlies Heightened Capsule Expression in Serotype M3 Group A Streptococci. *Infect Immun* 83:1732–1733. doi: 10.1128/IAI.02892-14
5. Chen L, Zheng D, Liu B, et al (2016) VFDB 2016: hierarchical and refined dataset for big data analysis—10 years on. *Nucleic Acids Res* 44:D694–D697. doi: 10.1093/nar/gkv1239
